# Supplementary material for: The effect of modulating the quantity of enzymes in a model ethanol pathway on metabolic flux in Synechocystis sp. PCC 6803
Source: PeerJ. 2019 Aug 28;7:e7529. doi: 10.7717/peerj.7529 (PMC6717505; doi:10.7717/peerj.7529)
Supplement: Data S1 [file peerj-07-7529-s002.xls]

## Sheet: Fig1
Fluorescence data
WT	RBS A	RBS B	RBS C	RBS D	RBS E
11561.2	18488	24274	32074.4	23374.9	32481.4
11307.7	16346.5	23350.9	31488.2	22682.2	32522.1
11449.1	17757.8	23677.9	33103.5	23141.4	30389.9
Optical Density 730 nm
WT	RBS A	RBS B	RBS C	RBS D	RBS E
0.623	0.4849	0.4921	0.4919	0.5562	0.5363
0.6195	0.4892	0.4801	0.4715	0.5713	0.5349
0.6308	0.497	0.4797	0.4662	0.5555	0.5391

## Sheet: Fig2
Ethanol production of strain library shown in Figure 3
strain	RBS PDC	RBS ADH	ethanol per OD (g/L/OD)		Optical Density (OD)		Titer (g/L)
11_1	A	A	0.0530997		4.71156		0.250183
11_2	A	A	0.05137		4.83084		0.24816
11_3	A	A	0.0455394		4.97112		0.226382
12_1	A	B	0.0669645		3.8514		0.257907
12_2	A	B	0.0730976		3.77664		0.276063
12_3	A	B	0.0679493		3.71868		0.252682
13_1	A	C	0.0690591		3.7506		0.259013
13_2	A	C	0.0639072		3.62796		0.231853
13_3	A	C	0.0652372		3.6792		0.240021
14_1	A	D	0.0604135		4.04292		0.244247
14_2	A	D	0.0656306		4.11768		0.270246
14_3	A	D	0.0623841		4.19664		0.261804
15_1	A	E	0.0739594		4.10088		0.303298
15_2	A	E	0.0625397		4.54944		0.284521
15_3	A	E	0.0641509		4.33272		0.277948
21_1	B	A	0.0508644		4.16724		0.211964		Representative growth data over 10 days for two extreme strain combinations
21_2	B	A	0.0560401		4.179		0.234192		The data shows growth of strains with strong PDC expression with weak (strain EA) or strong (strain ED) ADH, together with a reference strain (eYFP with RBS E, "Y_Ave")
21_3	B	A	0.0530788		3.98244		0.211383
22_1	B	B	0.0395494		5.00556		0.197967
22_2	B	B	0.0496469		4.683		0.232496
22_3	B	B	0.0476274		4.57128		0.217718
23_1	B	C	0.0581519		5.04084		0.293135
23_2	B	C	0.0688163		4.5234		0.311284
23_3	B	C	0.0517182		4.7082		0.2435
24_1	B	D	0.0598041		3.89508		0.232942
24_2	B	D	0.0576836		3.8766		0.223616
24_3	B	D	0.0615203		3.81108		0.234459
25_1	B	E	0.0443721		4.71744		0.209323
25_2	B	E	0.0411261		5.13492		0.211179
25_3	B	E	0.044082		4.56456		0.201215
31_1	C	A	0.0833668		3.76152		0.313586
31_2	C	A	0.0851355		3.58932		0.305578
31_3	C	A	0.0854784		3.50532		0.299629
32_1	C	B	0.0862115		3.85812		0.332614
32_2	C	B	0.0759488		3.95052		0.300037
32_3	C	B	0.0789787		3.84552		0.303714
33_1	C	C	0.0575726		4.84428		0.278898
33_2	C	C	0.0585306		4.3974		0.257382
33_3	C	C	0.0668073		4.40076		0.294003
34_1	C	D	0.0962314		3.71868		0.357854
34_2	C	D	0.088113		3.92532		0.345872
34_3	C	D	0.0904299		3.6792		0.33271
35_1	C	E	0.0825829		3.7212		0.307307
35_2	C	E	0.0853917		3.54396		0.302625
35_3	C	E	0.0819172		3.82032		0.31295
42_1	D	B	0.133536		3.4566		0.461581
42_2	D	B	0.129029		3.4734		0.44817
42_3	D	B	0.125087		3.55656		0.444879
43_1	D	C	0.120601		4.19916		0.506424
43_2	D	C	0.128943		3.91188		0.504411
43_3	D	C	0.0823099		4.87452		0.401221
44_1	D	D	0.132632		4.45032		0.590255
44_2	D	D	0.143544		4.1706		0.598666
44_3	D	D	0.13685		4.00008		0.547411
45_1	D	E	0.122627		3.7254		0.456836
45_2	D	E	0.128962		3.65232		0.471012
45_3	D	E	0.131554		3.69768		0.486444
51_1	E	A	0.118312		3.62796		0.429232
51_2	E	A	0.124133		3.6414		0.452018
51_3	E	A	0.12605		3.61032		0.45508
52_1	E	B	0.12962		3.5868		0.46492
52_2	E	B	0.133087		3.55152		0.472663
52_3	E	B	0.131719		3.6036		0.474664
53_1	E	C	0.134763		4.11516		0.554569
53_2	E	C	0.120689		4.30416		0.519464
53_3	E	C	0.120963		4.50576		0.545028
54_1	E	D	0.149616		3.56832		0.533879
54_2	E	D	0.152764		3.56076		0.543957
54_3	E	D	0.150771		3.44232		0.519003
55_1	E	E	0.120959		3.76824		0.455804
55_2	E	E	0.124715		3.969		0.494994
55_3	E	E	0.127701		3.69096		0.471339

## Sheet: Fig3
Quantity of each of the two over-expressed proteins, in each case relative to AtpB
PDC
WT	AA	AB	AC	AD	AE	BA	BB	BC	BD	BE	CA	CB	CC	CD	CE	DB	DC	DD	DE	EA	EB	EC	ED	EE
0.00401366	0.50641	0.690191	0.590469	0.74478	0.69643	0.648133	0.566141	0.680938	0.716593	0.61837	0.84756	0.958766	0.973578	1.01095	1.01926	1.43669	1.48941	1.71553	1.61826	1.81171	1.47902	1.6422	2.2801	2.05086
0.00627933	0.557476	0.698423	0.61607	0.702516	0.679901	0.705504	0.623501	0.687424	0.748462	0.648355	0.896917	1.08588	0.989014	1.00402	1.08147	1.50413	1.62788	1.72635	1.49208	1.64729	1.46022	1.72476	2.42253	1.99209
0.00369524	0.51468	0.684083	0.60251	0.747848	0.688278	0.751644	0.615479	0.641624	0.722735	0.614548	0.894799	1.13924	0.940374	1.20546	1.03111	1.32385	1.67951	1.64345	1.52491	1.60294	1.44598	1.62536	2.19413	1.97308
ADH
WT	AA	AB	AC	AD	AE	BA	BB	BC	BD	BE	CA	CB	CC	CD	CE	DB	DC	DD	DE	EA	EB	EC	ED	EE
0.26	0.61	0.85	0.92	1.18	1.14	0.76	0.59	0.79	1.02	1.13	0.77	0.73	0.86	1.23	1.26	1	1.16	1.47	1.75	0.99	0.97	1.12	1.64	1.65
0.27	0.68	0.84	0.98	1.11	1.21	0.82	0.64	0.79	1.13	1.09	0.78	0.84	0.81	1.26	1.41	0.98	1.2	1.47	1.7	0.98	1.02	1.19	1.76	1.63
0.25	0.67	0.89	1.02	1.2	1.19	0.95	0.71	0.83	1.1	1.04	0.81	0.79	0.81	1.23	1.31	0.94	1.22	1.38	1.61	1.08	0.98	1.27	1.64	1.64

## Sheet: Fig4
Replicate data in Fig3 and Fig4
All data below is for average across 3 replicates each
	ethanol g/l/OD	PDC/AtpB	ADH/AtpB
AA	0.050003	0.526189	0.653061
AB	0.069337	0.690899	0.863105
AC	0.066068	0.603017	0.970838
AD	0.062809	0.731715	1.16275
AE	0.066883	0.688203	1.18264
BA	0.053328	0.70176	0.842637
BB	0.045608	0.601707	0.647932
BC	0.059562	0.669996	0.803023
BD	0.059669	0.729263	1.08086
BE	0.043193	0.627091	1.08558
CA	0.08466	0.879759	0.786651
CB	0.08038	1.0613	0.788216
CC	0.06097	0.967655	0.823037
CD	0.091591	1.07348	1.23808
CE	0.083297	1.04395	1.32788
DB	0.129217	1.42155	0.973135
DC	0.110618	1.59894	1.19514
DD	0.137675	1.69511	1.43841
DE	0.127715	1.54508	1.68658
EA	0.122832	1.68731	1.01505
EB	0.131476	1.46174	0.990876
EC	0.125471	1.66411	1.19159
ED	0.151051	2.29892	1.68164
EE	0.124458	2.00534	1.64023

## Sheet: Fig5
				Quantity of protein relative to AtpB
Quantity of PDC and ADH
panel B					WT	AA	A	BB	B	CC	C	DD	D	EE	E
	pdc/atpB	adh/atpB		PDC	0	0.381567	0.633149	0.463685	0.660099	0.709725	1.4023	1.00392	2.09898	1.41453	2.1278
WT	0	0.342092			0	0.467904	0.605304	0.462998	0.585152	0.790698	1.03587	0.923364	2.10359	1.61137	2.00449
AA	0.421766	1.43257			0	0.415826	0.702027	0.455033	0.719531	0.751044	1.32196	0.914141	1.89217	1.48894	2.3761
A	0.646827	0.595994
BB	0.460572	1.28093		ADH	0.342092	1.44315	0.678151	1.34233	0.603039	1.74365	0.430602	1.9348	0.604753	2.72857	0.383417
B	0.654928	0.539514			0.434422	1.49693	0.623258	1.27694	0.47327	1.73215	0.595223	2.00576	0.550614	2.6339	0.631878
CC	0.750489	1.70097			0.249762	1.35762	0.486573	1.22353	0.542232	1.6271	0.578155	2.15577	0.488051	1.97302	0.38064
C	1.25338	0.53466
DD	0.947141	2.03211
D	2.03158	0.547806
EE	1.50495	2.44516
E	2.16946	0.465312		Optical Density 730 nm
				WT	AA	A	BB	B	CC	C	DD	D	EE	E
				0.3444	0.25641	0.31059	0.27825	0.22323	0.18774	0.36015	0.21231	0.22512	0.28686	0.27174
Panel A and C	Ethanol vs PDC quantity			0.33747	0.21294	0.33936	0.3066	0.19509	0.1869	0.32613	0.2436	0.23268	0.29799	0.29463
				0.42798	0.30366	0.33999	0.27594	0.22239	0.29694	0.25221	0.25557	0.24066	0.27174	0.22092
	avr etoh	pdc/atpB
AA	0.051359	0.421766
BB	0.05699	0.460572
CC	0.077379	0.750489		Ethanol (g/L/OD)
DD	0.087992	0.947141
EE	0.135837	1.50495		WT	AA	A	BB	B	CC	C	DD	D	EE	E
A	0.078562	0.646827		0.000187303	0.0475678	0.0766916	0.0531325	0.0784983	0.077954	0.118827	0.0890011	0.173686	0.118506	0.201532
B	0.076976	0.654928		0.000392475	0.0487875	0.0757978	0.056526	0.0732525	0.0695606	0.120048	0.0899216	0.170976	0.152385	0.203162
C	0.128777	1.25338		0.000199716	0.0577228	0.0831958	0.061312	0.0791782	0.0846237	0.147456	0.0850539	0.202318	0.136621	0.184196
D	0.182326	2.03158
E	0.196297	2.16946
Not included in graph
WT	0.004436	0

## Sheet: Fig6
Ethanol by HPLC (g/L/OD)
WT	EE	EE_AA	EE_AB	EE_AD	EE_BB	EE_DA	EE_DD	EE_DE	EE_EA
0.7641	0.569563	0.810279	0.591372	1.41759	0.628145	0.797333	1.65696	1.83559	0.728753
0.709284	0.563367	0.816023	0.653662	1.44384	0.557848	0.801265	1.73069	1.9377	0.822246
0.764348	0.586542	0.772789	0.671286	1.35439	0.584961	0.794829	1.6922	1.80387	0.758267
Protein quantity. All data normalised relative to AtpB
	WT	EE	EE_AA	EE_AB	EE_AD	EE_BB	EE_DA	EE_DD	EE_DE	EE_EA
PDC	0	0.874394	1.03581	0.890163	0.935846	0.80661	0.802707	0.9216	1.0617	0
	0	1.08342	0.972268	0.979937	1.05678	0.790802	0.795167	1.00033	1.10134	0
	0	1.02697	0.988333	0.942548	1.01733	0.841478	0.804952	0.93789	1.10259	0
ADH	0.167132	1.18062	1.14926	1.11734	1.21951	1.25732	1.203	1.34549	1.47972	0.2928
	0.189712	1.2885	1.23168	1.30068	1.22192	1.15242	1.34935	1.2346	1.53354	0.255057
	0.190946	1.34836	1.3133	1.23818	1.24802	1.30483	1.06378	1.29327	1.60674	0.298634
PYK	0	0	1.12041	0.965648	1.03393	0.0103208	1.20379	1.13644	1.22033	0.938777
	0	0	1.16796	1.08021	1.0465	0.0123326	1.07757	1.44789	1.39705	0.946879
	0	0	1.04279	0.962382	0.978538	0.0121465	1.19933	1.3821	1.45752	0.969365
BiBP	0.7641	0.569563	0.810279	0.591372	1.41759	0.628145	0.797333	1.65696	1.83559	0.728753
	0.709284	0.563367	0.816023	0.653662	1.44384	0.557848	0.801265	1.73069	1.9377	0.822246
	0.764348	0.586542	0.772789	0.671286	1.35439	0.584961	0.794829	1.6922	1.80387	0.758267
Optical density day 7 (730 nm)
	WT	EE	EE_AA	EE_AB	EE_AD	EE_BB	EE_DA	EE_DD	EE_DE	EE_EA
	6.14628	4.8552	4.65948	4.80816	4.75692	4.746	4.61244	4.57884	4.24536	5.36424	5.33064
	5.7456	5.07276	4.25124	4.86528	5.00892	4.78548	5.38104	4.73088	5.08452	5.17944	5.145
	5.62548	4.86108	4.78548	4.49568	4.71492	4.7922	4.91148	4.73592	4.77288	4.85436	4.81488
